# Supplementary material
Source: Springer Nature journal article supplement (https://www.springermedizin.de/resource/supplementary/12913_2011_2059_MOESM1_ESM.pdf/9529642)
Supplement: MOESM1 [file 9529642]

# 1. General Information

The questionnaire is aimed at non medical prescribers (NMPs). It should take you about 15 minutes to complete. Most questions require you to tick the box(s) that apply. If you make a mistake just tick the box you do require and it will change automatically. You can also scroll backward through the pages if you want to change a previous answer. Once you reach the end click on 'finish' and your answers will automatically be saved and sent to us.

## 1. Job Title

## 2. What is your job band?

- ☐ 5      ☐ 6      ☐ 7      ☐ 8a      ☐ 8b      ☐ 8c      ☐ 8d

☐ Other (please specify)

## 3. What geographical area(s) do you cover? (Please tick all that apply)

- ☐ Bedfordshire    ☐ Cambridgeshire    ☐ Essex    ☐ Hertfordshire    ☐ Norfolk    ☐ Suffolk

## 4. Who is your employer? (Please tick all that apply)

- ☐ Acute Trust      ☐ General Practice      ☐ Mental Health      ☐ PCT

☐ Other (please specify)

## 5. How many hours do you currently work?

- ☐ Full time
- ☐ Part-time, 21 hours or more per week
- ☐ Part time, between 10-20 hours per week
- ☐ Part-time, up to 10 hours per week

## 6. What age range are you in?

- ☐ 25 or under      ☐ 26-35      ☐ 36-45      ☐ 46-55      ☐ 56 or over

## 7. What is the highest level of education/academic qualification you have obtained?

- ☐ Certificate      ☐ Diploma      ☐ Degree      ☐ Masters      ☐ PhD

## 8. Which care setting do you work in?

- ☐ Primary      ☐ Secondary      ☐ Primary & Secondary      ☐ Intermediate      ☐ Tertiary      ☐ Mental Health

☐ Other (please specify)

## 9. What type of service (s) do you provide? (please tick all that apply)

- ☐ NHS hospital in-patient
- ☐ NHS hospital out-patient
- ☐ NHS community clinic
- ☐ Out of hours
- ☐ Walk in centre
- ☐ General Practice service
- ☐ Community
- ☐ Independent Sector
- ☐ HM Prison Services
- ☐ Other (please specify)

## 10. How many qualified NMPs are there in your team/work unit?

- |                                  |                              |                         |
|----------------------------------|------------------------------|-------------------------|
| <input type="radio"/> 1          | <input type="radio"/> 2      | <input type="radio"/> 3 |
| <input type="radio"/> 4          | <input type="radio"/> 5      | <input type="radio"/> 6 |
| <input type="radio"/> 7          | <input type="radio"/> 8      | <input type="radio"/> 9 |
| <input type="radio"/> 10 or more | <input type="radio"/> unsure |                         |

## 11. Please answer the following questions about the number of NMPs in your area of practice

|                                                                               | Yes                   | No                    | Don't know            |
|-------------------------------------------------------------------------------|-----------------------|-----------------------|-----------------------|
| a) Do you think there is a need for more NMPs in your team?                   | <input type="radio"/> | <input type="radio"/> | <input type="radio"/> |
| b) Are there plans to increase the number of NMPs in your team?               | <input type="radio"/> | <input type="radio"/> | <input type="radio"/> |
| c) Are any members of your team currently on the NMP course?                  | <input type="radio"/> | <input type="radio"/> | <input type="radio"/> |
| d) Is there anything that hampers expanding the numbers of NMPs in your team? | <input type="radio"/> | <input type="radio"/> | <input type="radio"/> |

If YES please specify

## 2. Prescribing Background

### 1. What prescribing qualification do you have?

- ☐ Community Practitioner Nurse Prescriber (v100)
- ☐ Community Practitioner Prescriber without a Specialist Practitioner Qualification (v150)
- ☐ Nurse Independent/Supplementary Prescriber (v200 & v300)
- ☐ Pharmacist Supplementary Prescriber
- ☐ Pharmacist Independent/Supplementary Prescriber
- ☐ Physiotherapist Supplementary Prescriber
- ☐ Podiatrist/chiroprapist Supplementary Prescriber
- ☐ Radiographer Supplementary Prescriber
- ☐ Optometrist Supplementary Prescriber
- ☐ Optometrist Independent/Supplementary Prescriber

### 2. How many years have you been qualified as a prescriber?

- ☐ <1 year      ☐ 1-3 years      ☐ 3-5 years      ☐ >5 years

### 3. How much experience did you have in your main area of prescribing practice before undertaking the prescribing programme?

- ☐ < 1year      ☐ 1-2 years      ☐ 2-5 years      ☐ >5 years

### 4. Prior to undertaking the prescribing programme, had you undergone any specialist training in your area of prescribing practice? (please tick all that apply)

- ☐ Diploma level module/s
- ☐ Accredited study day/s (e.g. University/RCN)
- ☐ Degree level module/s
- ☐ No specialist training
- ☐ Masters level module/s
- ☐ Other training (e.g. drug company study days/ conferences) (please specify)

**5. Please indicate what training experience you had in the following areas BEFORE undertaking the prescribing programme (please tick all that apply)**

|                                   | a) Accredited learning through an institution (e.g. university, professional body or prescribing forum) | b) Learning not accredited via university (e.g. drug company training day, conferences, independent provider) | c) Experiential learning/ on the job training | d) None                  |
|-----------------------------------|---------------------------------------------------------------------------------------------------------|---------------------------------------------------------------------------------------------------------------|-----------------------------------------------|--------------------------|
| a) Assessment & diagnostic skills | <input type="checkbox"/>                                                                                | <input type="checkbox"/>                                                                                      | <input type="checkbox"/>                      | <input type="checkbox"/> |
| b) Pharmacology                   | <input type="checkbox"/>                                                                                | <input type="checkbox"/>                                                                                      | <input type="checkbox"/>                      | <input type="checkbox"/> |
| c) Numeracy                       | <input type="checkbox"/>                                                                                | <input type="checkbox"/>                                                                                      | <input type="checkbox"/>                      | <input type="checkbox"/> |

**6. Please indicate what training experience you have had in the following areas SINCE qualifying as a prescriber (please tick all that apply)**

|                                   | a) Accredited learning through an institution (e.g. university, professional body or prescribing forum) | b) Learning not accredited via university (e.g. drug company training day, conferences, independent provider) | c) Experiential learning/ on the job training | d) None                  |
|-----------------------------------|---------------------------------------------------------------------------------------------------------|---------------------------------------------------------------------------------------------------------------|-----------------------------------------------|--------------------------|
| a) Assessment & Diagnostic skills | <input type="checkbox"/>                                                                                | <input type="checkbox"/>                                                                                      | <input type="checkbox"/>                      | <input type="checkbox"/> |
| b) Pharmacology                   | <input type="checkbox"/>                                                                                | <input type="checkbox"/>                                                                                      | <input type="checkbox"/>                      | <input type="checkbox"/> |
| c) Numeracy                       | <input type="checkbox"/>                                                                                | <input type="checkbox"/>                                                                                      | <input type="checkbox"/>                      | <input type="checkbox"/> |

### 3. Prescribing Practice

**1. Which method of prescribing do you currently use? (please tick all that apply)**

- ☐ Independent Prescribing (IP)
- ☐ Supplementary Prescribing (SP-using a clinical management plan)
- ☐ I do not prescribe (please give reason(s) below) (if you don't prescribe please skip until Q4)

*[Redacted]*

**2. If you use supplementary prescribing please indicate the reason(s)why: (please tick all that apply)**

**(if you don't use SP please skip to the next question)**

- ☐ a) Only qualified as supplementary prescriber
- ☐ b) Current formulary restrictions on controlled drugs
- ☐ c) Trust policy
- ☐ d) Personal preference
- ☐ e) Other (please specify)

**3. Please indicate how many items you currently prescribe in a typical week using IP and/or SP:**

**(please put a tick in both rows)**

|    | 0 | 1-5 | 6-10 | 11-20 | 21-30 | 31-40 | 41-50 | >50 |
|----|---|-----|------|-------|-------|-------|-------|-----|
| IP |   |     |      |       |       |       |       |     |
| SP |   |     |      |       |       |       |       |     |

#### 4. Please indicate how often you use your prescribing qualification in the following ways:

|                                                                                          | never                 | rarely (once a month or less) | infrequently (every 2-3 weeks) | regularly (weekly)    | frequently (2-3 times a week) | very frequently (daily) |
|------------------------------------------------------------------------------------------|-----------------------|-------------------------------|--------------------------------|-----------------------|-------------------------------|-------------------------|
| Remote prescribing via telephone, email, fax etc.                                        | <input type="radio"/> | <input type="radio"/>         | <input type="radio"/>          | <input type="radio"/> | <input type="radio"/>         | <input type="radio"/>   |
| Make recommendation via letter/email or telephone to GP for medicine(s) to be prescribed | <input type="radio"/> | <input type="radio"/>         | <input type="radio"/>          | <input type="radio"/> | <input type="radio"/>         | <input type="radio"/>   |
| Make recommendation via patient's hospital notes for medicine(s) to be prescribed        | <input type="radio"/> | <input type="radio"/>         | <input type="radio"/>          | <input type="radio"/> | <input type="radio"/>         | <input type="radio"/>   |
| Make recommendation for patient to buy medicine(s) over the counter                      | <input type="radio"/> | <input type="radio"/>         | <input type="radio"/>          | <input type="radio"/> | <input type="radio"/>         | <input type="radio"/>   |
| Medication review                                                                        | <input type="radio"/> | <input type="radio"/>         | <input type="radio"/>          | <input type="radio"/> | <input type="radio"/>         | <input type="radio"/>   |
| Amend prescribed medication (i.e. stop, alter or correct dosage)                         | <input type="radio"/> | <input type="radio"/>         | <input type="radio"/>          | <input type="radio"/> | <input type="radio"/>         | <input type="radio"/>   |
| Issue FP10 prescription directly to patient                                              | <input type="radio"/> | <input type="radio"/>         | <input type="radio"/>          | <input type="radio"/> | <input type="radio"/>         | <input type="radio"/>   |
| Sign FP10 prescriptions printed via GP repeat prescribing system                         | <input type="radio"/> | <input type="radio"/>         | <input type="radio"/>          | <input type="radio"/> | <input type="radio"/>         | <input type="radio"/>   |
| Issue hospital specific prescription directly to patient                                 | <input type="radio"/> | <input type="radio"/>         | <input type="radio"/>          | <input type="radio"/> | <input type="radio"/>         | <input type="radio"/>   |
| Issue private prescription directly to patient                                           | <input type="radio"/> | <input type="radio"/>         | <input type="radio"/>          | <input type="radio"/> | <input type="radio"/>         | <input type="radio"/>   |
| Prescribe via hospital medication charts                                                 | <input type="radio"/> | <input type="radio"/>         | <input type="radio"/>          | <input type="radio"/> | <input type="radio"/>         | <input type="radio"/>   |
| Supply and administer medicines via Patient group directions (PGD)                       | <input type="radio"/> | <input type="radio"/>         | <input type="radio"/>          | <input type="radio"/> | <input type="radio"/>         | <input type="radio"/>   |
| other                                                                                    | <input type="radio"/> | <input type="radio"/>         | <input type="radio"/>          | <input type="radio"/> | <input type="radio"/>         | <input type="radio"/>   |

please specify in what other ways you use your prescribing qualification

**5. In which therapy areas do you prescribe (please tick all that apply)?**

**(if you DON'T prescribe please skip to the next question)**

- |                                                   |                                                       |                                            |
|---------------------------------------------------|-------------------------------------------------------|--------------------------------------------|
| <input type="checkbox"/> Anaesthesia              | <input type="checkbox"/> Gastroenterology             | <input type="checkbox"/> Palliative care   |
| <input type="checkbox"/> Anticoagulation          | <input type="checkbox"/> Haematology                  | <input type="checkbox"/> Renal             |
| <input type="checkbox"/> Cardiovascular           | <input type="checkbox"/> Hepatology                   | <input type="checkbox"/> Respiratory       |
| <input type="checkbox"/> Dementia                 | <input type="checkbox"/> Immunisations & Vaccinations | <input type="checkbox"/> Rheumatology      |
| <input type="checkbox"/> Dermatology              | <input type="checkbox"/> Mental health                | <input type="checkbox"/> Sexual Health     |
| <input type="checkbox"/> Diabetes                 | <input type="checkbox"/> Minor ailments               | <input type="checkbox"/> Smoking cessation |
| <input type="checkbox"/> Drug & substance Misuse  | <input type="checkbox"/> Neurology                    | <input type="checkbox"/> Urology           |
| <input type="checkbox"/> Emergency medicine (A/E) | <input type="checkbox"/> Oncology                     | <input type="checkbox"/> Womens health     |
| <input type="checkbox"/> Family planning          | <input type="checkbox"/> Pain                         | <input type="checkbox"/> Wound care        |

Other (please specify)

## 4. Governance and Support

### 1. Please indicate your experience in the following areas:(Please tick each row)

|                                                                                                                | Yes                      | No                       |
|----------------------------------------------------------------------------------------------------------------|--------------------------|--------------------------|
| My employer provides me with each edition of the BNF/NPF                                                       | <input type="checkbox"/> | <input type="checkbox"/> |
| My employer has an up-to-date non medical prescribing policy                                                   | <input type="checkbox"/> | <input type="checkbox"/> |
| My employer ensures that I receive all relevant clinical information e.g. patient safety notices & drug alerts | <input type="checkbox"/> | <input type="checkbox"/> |
| My employer has involved me in the development of local formularies and guidelines                             | <input type="checkbox"/> | <input type="checkbox"/> |
| I have provided my employer with a specimen signature                                                          | <input type="checkbox"/> | <input type="checkbox"/> |
| My scope of prescribing practice has been agreed with my employer                                              | <input type="checkbox"/> | <input type="checkbox"/> |
| My employer provides me with regular data to monitor my prescribing practice                                   | <input type="checkbox"/> | <input type="checkbox"/> |
| I am able to monitor/ access my own prescribing data (via PACT or otherwise)                                   | <input type="checkbox"/> | <input type="checkbox"/> |
| I have access to appropriate CPD to support me in my prescribing role (via employer/trust or independently)    | <input type="checkbox"/> | <input type="checkbox"/> |
| I am involved with regular clinical audit and review of my clinical services                                   | <input type="checkbox"/> | <input type="checkbox"/> |
| I know how to contact my NMP lead                                                                              | <input type="checkbox"/> | <input type="checkbox"/> |

### 2. Have you received any support on an individual basis from your NMP lead? (Please tick each row)

|                                                 | Yes                   | No                    | Not required          |
|-------------------------------------------------|-----------------------|-----------------------|-----------------------|
| a) Before undertaking the prescribing programme | <input type="radio"/> | <input type="radio"/> | <input type="radio"/> |
| b) During the prescribing programme             | <input type="radio"/> | <input type="radio"/> | <input type="radio"/> |
| c) After completing the prescribing programme   | <input type="radio"/> | <input type="radio"/> | <input type="radio"/> |



**3. The statements below are designed to explore your experiences of your PREPARATION for the prescribing role: (please rate each statement)**

|                                                                                                                     | strongly disagree     | disagree              | neither agree or disagree | agree                 | strongly agree        |
|---------------------------------------------------------------------------------------------------------------------|-----------------------|-----------------------|---------------------------|-----------------------|-----------------------|
| a) My employer was supportive of my request to undertake the prescribing programme                                  | <input type="radio"/> | <input type="radio"/> | <input type="radio"/>     | <input type="radio"/> | <input type="radio"/> |
| b) I had difficulties in identifying a suitable designated medical practitioner (DMP) for the prescribing programme | <input type="radio"/> | <input type="radio"/> | <input type="radio"/>     | <input type="radio"/> | <input type="radio"/> |
| c) I had a clear idea of what would be expected from me during the course                                           | <input type="radio"/> | <input type="radio"/> | <input type="radio"/>     | <input type="radio"/> | <input type="radio"/> |
| d) I agreed my prescribing role with my employer prior to undertaking the prescribing programme                     | <input type="radio"/> | <input type="radio"/> | <input type="radio"/>     | <input type="radio"/> | <input type="radio"/> |

**4. The statements below are designed to explore your experiences DURING the prescribing programme: (please rate each statement)**

|                                                                                                                                   | strongly disagree     | disagree              | neither agree or disagree | agree                 | strongly agree        |
|-----------------------------------------------------------------------------------------------------------------------------------|-----------------------|-----------------------|---------------------------|-----------------------|-----------------------|
| a) I was able to access the support I required from my DMP                                                                        | <input type="radio"/> | <input type="radio"/> | <input type="radio"/>     | <input type="radio"/> | <input type="radio"/> |
| b) My employer was supportive of programme requirements (e.g. study leave for taught element and 12 days of clinical practice)    | <input type="radio"/> | <input type="radio"/> | <input type="radio"/>     | <input type="radio"/> | <input type="radio"/> |
| c) My DMP was able to provide me with appropriate learning opportunities                                                          | <input type="radio"/> | <input type="radio"/> | <input type="radio"/>     | <input type="radio"/> | <input type="radio"/> |
| d) The programme equipped me with the appropriate knowledge, skills and competencies to prescribe in my area of clinical practice | <input type="radio"/> | <input type="radio"/> | <input type="radio"/>     | <input type="radio"/> | <input type="radio"/> |
| e) I am satisfied with the level of support and supervision I received from my DMP                                                | <input type="radio"/> | <input type="radio"/> | <input type="radio"/>     | <input type="radio"/> | <input type="radio"/> |
| f) I had difficulty meeting the learning outcomes of the programme                                                                | <input type="radio"/> | <input type="radio"/> | <input type="radio"/>     | <input type="radio"/> | <input type="radio"/> |

**5. If you experienced difficulties completing the learning outcomes of the prescribing programme please indicate what they were: (please tick all that apply) (If you did not experience any difficulties please skip to the next question)**

☐ a) Assessment & Diagnostic skills

☐ d) Time/volume of study

☐ b) Pharmacology

☐ e) level of academic study

☐ c) Numeracy

☐ Other (please specify)

**6. The statements below are designed to explore your experiences AFTER the prescribing programme: (please rate each statement)**

|                                                                                                                                          | strongly disagree     | disagree              | neither agree or disagree | agree                 | strongly agree        | N/A                   |
|------------------------------------------------------------------------------------------------------------------------------------------|-----------------------|-----------------------|---------------------------|-----------------------|-----------------------|-----------------------|
| I continue to receive support from my DMP/other clinician for my prescribing role                                                        | <input type="radio"/> | <input type="radio"/> | <input type="radio"/>     | <input type="radio"/> | <input type="radio"/> | <input type="radio"/> |
| Prescribing ensures better use of my skills                                                                                              | <input type="radio"/> | <input type="radio"/> | <input type="radio"/>     | <input type="radio"/> | <input type="radio"/> | <input type="radio"/> |
| My employer provides an appropriate level of support for my prescribing role (e.g. prescribing forum, action learning sets)              | <input type="radio"/> | <input type="radio"/> | <input type="radio"/>     | <input type="radio"/> | <input type="radio"/> | <input type="radio"/> |
| The ability to prescribe improves the quality of care I am able to offer patients                                                        | <input type="radio"/> | <input type="radio"/> | <input type="radio"/>     | <input type="radio"/> | <input type="radio"/> | <input type="radio"/> |
| My peers/ team members are supportive of my prescribing role                                                                             | <input type="radio"/> | <input type="radio"/> | <input type="radio"/>     | <input type="radio"/> | <input type="radio"/> | <input type="radio"/> |
| Opposition or resistance (from doctors, and other health care professionals) has hampered my ability to use my prescribing qualification | <input type="radio"/> | <input type="radio"/> | <input type="radio"/>     | <input type="radio"/> | <input type="radio"/> | <input type="radio"/> |
| I receive support for my prescribing role from the local, or trust, pharmacist                                                           | <input type="radio"/> | <input type="radio"/> | <input type="radio"/>     | <input type="radio"/> | <input type="radio"/> | <input type="radio"/> |
| I am able to prescribe all the drugs I need in order to do my job (if disagree or strongly disagree please provide details below)        | <input type="radio"/> | <input type="radio"/> | <input type="radio"/>     | <input type="radio"/> | <input type="radio"/> | <input type="radio"/> |
| Overall I am satisfied with the level of support I receive in my role as a prescriber                                                    | <input type="radio"/> | <input type="radio"/> | <input type="radio"/>     | <input type="radio"/> | <input type="radio"/> | <input type="radio"/> |
| I am limited in my prescribing practice (if agree or strongly agree please provide details below)                                        | <input type="radio"/> | <input type="radio"/> | <input type="radio"/>     | <input type="radio"/> | <input type="radio"/> | <input type="radio"/> |

Please provide any free text comments here

## 5. Thank you

Thank you for taking the time to complete this survey

**1. Please indicate if you are interested in receiving a summary of the results of this survey, or would be interested in being considered for invitation to take part in the next phase of this research.**

- ☐ Yes, I would like a summary of the survey results
- ☐ Yes, I may be interested in taking part in further research

**2. If you answered yes to either of the above, please provide contact details. Your details will remain confidential and will not be published in the survey results.**

|                |                      |
|----------------|----------------------|
| Name:          | <input type="text"/> |
| Employer:      | <input type="text"/> |
| Address:       | <input type="text"/> |
| Address 2:     | <input type="text"/> |
| City/Town:     | <input type="text"/> |
| Postcode:      | <input type="text"/> |
| Email Address: | <input type="text"/> |
| Phone Number:  | <input type="text"/> |

### 3. General comments

|                      |                      |
|----------------------|----------------------|
| <input type="text"/> | <input type="text"/> |
|----------------------|----------------------|
